# Supplementary material
Source: PubMed Central journal article supplement (PMC5740251)
Supplement: BPH-175-3-s001.pdf [file BPH-175-3-s001.pdf]

Supplemental Data

We provide a series of tables below that provide the individual values and citations that correspond to the data points in the summary figures.

AM2/IMD data for Figures 3 and 7

| Cell Type | pEC <sub>50</sub> |                          |                          | Reference                                                                                                                                                                                                                                                             |
|-----------|-------------------|--------------------------|--------------------------|-----------------------------------------------------------------------------------------------------------------------------------------------------------------------------------------------------------------------------------------------------------------------|
|           | CGRP receptor     | AM <sub>1</sub> receptor | AM <sub>2</sub> receptor |                                                                                                                                                                                                                                                                       |
| HEK-293T  | 8                 | 7.5                      | 9                        | Chang 2004 Intermedin, a novel calcitonin family peptide that exists in teleosts as well as in mammals: a comparison with other family peptides (Values from Hong 2012 The Pharmacology of Adrenomedullin2/Intermedin)                                                |
| Cos-7     | 8.71              | 8.1                      | 8.69                     | Hay 2005 Pharmacological Discrimination of Calcitonin Receptor: Receptor Activity-Modifying Protein Complexes                                                                                                                                                         |
| SK-N-MC   | 7.24              |                          |                          | Pin 2007 Desensitization and re-sensitization of CGRP receptor function in human neuroblastoma SK-N-MC cells                                                                                                                                                          |
| Cos-7     | 9.07              |                          | 10.1                     | Qi 2008 Identification of N-terminal Receptor activity-modifying protein residues important for CGRP, AM and AMY receptor function                                                                                                                                    |
| Cos-7     | 8.24              |                          | 8.96                     | Qi 2011 Structure-function analysis of amino acid 74 of human RMAP1 and RAMP3 and its role in peptide interactions with adrenomedullin and CGRP                                                                                                                       |
| HEK293T   | 7.5               | 7.7                      | 9.2                      | Roh 2004 Intermedin Is a Calcitonin/Calcitonin Gene-related Peptide Family Peptide Acting through the Calcitonin Receptor-like Receptor/Receptor Activity-modifying Protein Receptor Complexes (Values from Hong 2012 The Pharmacology of Adrenomedullin2/Intermedin) |
| Cos-7     | 7.9               | 7.5                      | 8.9                      | Takei 2004 Novel fish-derived adrenomedullin in mammals: structure and possible function (Values from Hong 2012 The Pharmacology of Adrenomedullin2/Intermedin)                                                                                                       |
| Cos-7     | 8.42              | 8.21                     | 9.156                    | Watkins 2014 Receptor activity-modifying protein-dependent effects of mutations in the calcitonin receptor-like receptor: implications of AM and CGRP pharmacology                                                                                                    |
| HEK-293   | 7.93              | 7.46                     | 9.1                      | Weston, C 2016 Receptor Activity Modifying Protein-Directed G Protein Signaling Specificity for the Calcitonin Gene-related Peptide Family of Receptors                                                                                                               |
| HEK-293S  | 8.74              | 8.57                     | 8.01                     | Weston, C 2016 Receptor Activity Modifying Protein-Directed G Protein Signaling Specificity for the Calcitonin Gene-related Peptide Family of Receptors                                                                                                               |
| CHO-K1    | 7.74              | 8.27                     |                          | Wunder 2008 Pharmacological and Kinetic Characterization of AM1 and CGRP receptor reporter cell lines                                                                                                                                                                 |

AM data for figures 3 and 7

| Cell Type              | pEC <sub>50</sub> |                          |                          | Reference                                                                                                                                                                                                                                                                                                                                                 |
|------------------------|-------------------|--------------------------|--------------------------|-----------------------------------------------------------------------------------------------------------------------------------------------------------------------------------------------------------------------------------------------------------------------------------------------------------------------------------------------------------|
|                        | CGRP receptor     | AM <sub>1</sub> receptor | AM <sub>2</sub> receptor |                                                                                                                                                                                                                                                                                                                                                           |
| HEK-293                | 6.96              | 8.47                     | 8.47                     | Aiyar 2001 Receptor activity modifying proteins interaction with human and porcine CRLR in HEK-293                                                                                                                                                                                                                                                        |
| COS-7                  | 8.42              |                          |                          | Bailey 2006 Pharmacology of the human CGRP1 receptor in COS-7 cells                                                                                                                                                                                                                                                                                       |
| Cos-7                  |                   |                          | 10.1                     | Bailey 2010 Functional characterization of two human receptor activity-modifying protein 3 variants                                                                                                                                                                                                                                                       |
| COS-7                  |                   | 9.22                     |                          | Booe 2015 Structural Basis for RAMP dependent selective peptide recognition by a GPCR                                                                                                                                                                                                                                                                     |
| HEK-293T               | 7.27              | 8.33                     | 8.39                     | Fraser 1999 The Amino Terminus of Receptor Activity Modifying Proteins is a Critical Determinant of Glycosylation State and Ligand Binding of CRLR                                                                                                                                                                                                        |
| COS-7                  |                   |                          | 9.21                     | Hay 2006 Determinants of 1-Piperidinecarboxamide, N-[2-[[[5-Amino-1-[[4-(4-pyridinyl)-1-piperazinyl]carbonyl]pentyl]amino]-1-[(3,5-dibromo-4-hydroxyphenyl)methyl]-2-oxoethyl]-4-(1,4-dihydro-2-oxo-3(2H)-quinazolinyl)] (BIBN4096BS) Affinity for Calcitonin Gene-Related Peptide and Amylin Receptors—The Role of Receptor Activity Modifying Protein 1 |
| COS-7                  |                   | 8.8                      | 9.06                     | Hay 2003 CL/RAMP2 and CL/RAMP3 produce pharmacologically distinct adrenomedullin receptors: a comparison of effects of adrenomedullin22-52 CGRP8-37 BIBN4096BS                                                                                                                                                                                            |
| HEK-293                |                   | 8.59                     |                          | Kubo 2014 Biological properties of adrenomedullin conjugated with polyethylene glycol                                                                                                                                                                                                                                                                     |
| HEK293                 | 8.86              | 9.34                     |                          | Kuwasako 2001 The seven amino acids of human RAMP2 (86-92) and RAMP3 (59-65) are critical for agonist binding to human adrenomedullin receptors                                                                                                                                                                                                           |
| HEK293                 | 8.96              | 9.41                     | 9.06                     | Kuwasako 2000 Visualization of the Calcitonin Receptor-like Receptor and Its Receptor Activity-modifying Proteins during Internalization and Recycling                                                                                                                                                                                                    |
| HEK293 stable RAMP2    |                   | 9.73                     |                          | Kuwasako 2017 β-arrestins negatively control human adrenomedullin type 1-receptor internalization                                                                                                                                                                                                                                                         |
| HEK293 stable RAMP2    |                   | 9.29                     |                          | Kuwasako 2016 Inhibitory effects of two G protein-coupled receptor kinases on the cell surface expression and signaling of the human adrenomedullin receptor                                                                                                                                                                                              |
| HEK293                 | 7.92              | 8.95                     | 9.12                     | Kuwasako 2012 The third extracellular loop of the human calcitonin receptor-like receptor is crucial for the activation of adrenomedullin signalling                                                                                                                                                                                                      |
| HEK293 stable CLR-eGFP |                   | 9.76                     | 9.56                     | Kuwasako 2012 Characterization of the single transmembrane domain of human receptor activity-modifying protein 3 in adrenomedullin receptor internalization                                                                                                                                                                                               |
| HEK293 stable RAMP2    |                   | 9.16                     |                          | Kuwasako 2011 Structure–function analysis of helix 8 of human calcitonin receptor-like receptor within the adrenomedullin 1 receptor                                                                                                                                                                                                                      |
| HEK-293                |                   | 9.49                     | 9.55                     | Kuwasako 2008 Functions of the extracellular histidine residues of receptor activity-modifying proteins vary with adrenomedullin receptors                                                                                                                                                                                                                |
| HEK-293 stable RAMP2   |                   | 8.99                     |                          | Kuwasako 2010 Function of the cytoplasmic tail of human calcitonin receptor-like receptor in complex with receptor activity-modifying protein 2                                                                                                                                                                                                           |
| HEK-293 Stable CLR-GFP |                   | 9.42                     | 9.39                     | Kuwasako 2006 Functions of the Cytoplasmic Tails of the Human Receptor Activity-modifying Protein Components of Calcitonin Gene-related Peptide and Adrenomedullin Receptors*                                                                                                                                                                             |
| SK-N-MC                | 7.51              |                          |                          | Pin 2007 Desensitization and re-sensitization of CGRP receptor function in human neuroblastoma SK-N-MC cells                                                                                                                                                                                                                                              |

|          |      |       |       |                                                                                                                                                                                                             |
|----------|------|-------|-------|-------------------------------------------------------------------------------------------------------------------------------------------------------------------------------------------------------------|
| CHO-K1   |      | 9.74  |       | Pin 2007 Desensitization and re-sensitization of CGRP receptor function in human neuroblastoma SK-N-MC cells                                                                                                |
| Cos-7    | 8.27 |       | 9.92  | Qi 2008 Identification of N-terminal Receptor activity-modifying protein residues important for CGRP, AM and AMY receptor function                                                                          |
| Cos-7    | 8.04 |       | 9.76  | Qi 2011 Structure-function analysis of amino acid 74 of human RAMP1 and RAMP3 and its role in peptide interactions with adrenomedullin and CGRP                                                             |
| COS-7    | 8.51 |       | 9.9   | Qi 2010 Structure-Function Analysis of RAMP1-RAMP3 Chimeras                                                                                                                                                 |
| COS-7    |      |       | 10.1  | Robinson 2009 Novel Peptide Antagonists of Adrenomedullin and CGRP receptor: Identification, Pharmacological Characterization, and Interactions with Position 74 in Receptor Activity Modifying Protein 1/3 |
| COS-7    | 8.45 |       |       | Simms J 2009 Structure-Function Analysis of RAMP1 by Alanine Mutagenesis                                                                                                                                    |
| Cos-7    | 8    | 9.9   | 9.7   | Takei 2004 Novel fish-derived adrenomedullin in mammals: structure and possible function (Values from Hong 2012 The Pharmacology of Adrenomedullin2/Intermedin)                                             |
| COS-7    | 8.51 | 9.39  | 9.48  | Udawela M 2006a A critical role for the short intracellular C terminus in receptor activity-modifying protein function                                                                                      |
| HEK293   | 7.07 | 7.63  | 8.29  | Udawela M 2006a A critical role for the short intracellular C terminus in receptor activity-modifying protein function                                                                                      |
| Cos-7    | 8.37 | 9.04  | 9.539 | Watkins HA 2014 Receptor activity-modifying protein-dependent effects of mutations in the calcitonin receptor-like receptor: implications of AM and CGRP pharmacology                                       |
| Cos-7    |      | 9.12  | 9.27  | Watkins HA 2016 Receptor activity-modifying proteins 2 and 3 generate adrenomedullin receptor subtypes with distinct molecular properties                                                                   |
| Cos-7    |      | 9.5   |       | Watkins HA 2013 Identification of key residues involved in adrenomedullin binding to the AM1 receptor                                                                                                       |
| HEK-293T |      | 8.5   |       | Weston 2015 Modulation of Glucagon Receptor Pharmacology by Receptor Activity-modifying Protein-2 (RAMP2)                                                                                                   |
| HEK-293  | 7.93 | 10.35 | 8.98  | Weston C 2016 Receptor Activity Modifying Protein-Directed G Protein Signaling Specificity for the Calcitonin Gene-related Peptide Family of Receptors                                                      |
| HEK-293S | 8.13 | 9.39  | 9.63  | Weston C 2016 Receptor Activity Modifying Protein-Directed G Protein Signaling Specificity for the Calcitonin Gene-related Peptide Family of Receptors                                                      |
| COS-7    | 8.12 |       |       | Woolley 2013 The role of ECL2 in CGRP receptor activation: a combined modelling and experimental approach                                                                                                   |
| CHO-K1   | 8.44 | 9.45  |       | Wunder 2008 Pharmacological and Kinetic Characterization of AM1 and CGRP receptor reporter cell lines                                                                                                       |

$\alpha$ CGRP for figures 3 and 7

| Cell Type              | pEC <sub>50</sub> |                          |                          | Reference                                                                                                                                                                                                                                                                                                                                               |
|------------------------|-------------------|--------------------------|--------------------------|---------------------------------------------------------------------------------------------------------------------------------------------------------------------------------------------------------------------------------------------------------------------------------------------------------------------------------------------------------|
|                        | CGRP receptor     | AM <sub>1</sub> receptor | AM <sub>2</sub> receptor |                                                                                                                                                                                                                                                                                                                                                         |
| HEK-293                | 9.01              | 6.83                     | 6.55                     | Aiyar 2001 Receptor activity modifying proteins interaction with human and porcine CRLR in HEK-293                                                                                                                                                                                                                                                      |
| Cos-7                  | 10.11             |                          |                          | Bailey 2006 Pharmacology of the human CGRP1 receptor in COS-7 cells                                                                                                                                                                                                                                                                                     |
| HEK293T                | 8.79              |                          |                          | Banerjee 2006 Identification of specific calcitonin-like receptor residues important for calcitonin gene-related peptide high affinity binding                                                                                                                                                                                                          |
| Cos-7                  | 9.46              |                          |                          | Barwell 2010 Mapping interaction sites within the N-terminus of the calcitonin gene-related peptide receptor; the role of residues 23–60 of the calcitonin receptor-like receptor                                                                                                                                                                       |
| COS-7                  | 9.81              |                          |                          | Barwell 2011 Extracellular loops 1 and 3 and their associated transmembrane regions of the calcitonin receptor-like receptor are needed for CGRP receptor function                                                                                                                                                                                      |
| COS-7                  | 9.65              |                          |                          | Booe 2015 Structural Basis for RAMP dependent selective peptide recognition by a GPCR                                                                                                                                                                                                                                                                   |
| Cos-7                  | 9.35              |                          |                          | Conner 2005 A Key Role for Transmembrane Prolines in Calcitonin Receptor-Like Receptor Agonist Binding and Signalling: Implications for Family B G-Protein-Coupled Receptors                                                                                                                                                                            |
| COS-7                  | 9.4               |                          |                          | Conner 2006 Diverse functional motifs within the three intracellular loops of the CGRP1 receptor                                                                                                                                                                                                                                                        |
| Cos-7                  | 9.53              |                          |                          | Conner 2006 The Second Intracellular Loop of the Calcitonin Gene-related Peptide Receptor Provides Molecular Determinants for Signal Transduction and Cell Surface Expression                                                                                                                                                                           |
| COS-7                  | 9.85              |                          |                          | Conner 2008 Functional and Biophysical analysis of the C-terminus of the CGRP-receptor; a Family B GPCR                                                                                                                                                                                                                                                 |
| HEK-293 tSA201         | 10.44             |                          |                          | Fitzsimmons 2003 The Extracellular domain of Receptor Activity-modifying Protein 1 is sufficient for Calcitonin Receptor-like Receptor Function                                                                                                                                                                                                         |
| HEK-293T               | 8.18              | 6.72                     | 6.64                     | Fraser 1999 The Amino Terminus of Receptor Activity Modifying Proteins is a Critical Determinant of Glycosylation State and Ligand Binding of CRLR                                                                                                                                                                                                      |
| Cos-7                  | 9.47              | 6.39                     | 6.87                     | Hay 2005 Pharmacological Discrimination of Calcitonin Receptor: Receptor Activity-Modifying Protein Complexes                                                                                                                                                                                                                                           |
| COS-7                  | 9.52              |                          | 6.67                     | Hay 2006 Determinants of 1-Piperidinecarboxamide, N-[2-[[5-Amino-1-[[4-(4-pyridinyl)-1-piperazinyl]carbonyl]pentyl]amino]-1-[(3,5-dibromo-4-hydroxyphenyl)methyl]-2-oxoethyl]-4-(1,4-dihydro-2-oxo-3(2H)-quinazolonyl) (BIBN4096BS) Affinity for Calcitonin Gene-Related Peptide and Amylin Receptors—The Role of Receptor Activity Modifying Protein 1 |
| HEK293                 | 9.47              |                          |                          | Kuwasako 2000 Visualization of the Calcitonin Receptor-like Receptor and Its Receptor Activity-modifying Proteins during Internalization and Recycling                                                                                                                                                                                                  |
| HEK293                 | 9.47              |                          |                          | Kuwasako 2001 The seven amino acids of human RAMP2 (86-92) and RAMP3 (59-65) are critical for agonist binding to human adrenomedullin receptors                                                                                                                                                                                                         |
| HEK-293                | 9.16              |                          |                          | Kuwasako 2003 Identification of the Human Receptor Activity-modifying Protein 1 Domains Responsible for Agonist Binding Specificity                                                                                                                                                                                                                     |
| HEK-293 Stable CLR-GFP | 9.77              |                          |                          | Kuwasako 2006 Functions of the Cytoplasmic Tails of the Human Receptor Activity-modifying Protein Components of Calcitonin Gene-related Peptide and Adrenomedullin Receptors*                                                                                                                                                                           |

|          |       |      |      |                                                                                                                                                                                              |
|----------|-------|------|------|----------------------------------------------------------------------------------------------------------------------------------------------------------------------------------------------|
| HEK293   | 9.7   | 6.63 | 7.13 | Kuwasako 2012 The third extracellular loop of the human calcitonin receptor-like receptor is crucial for the activation of adrenomedullin signalling                                         |
| COS-7    | 9.64  |      |      | Miller 2010 Non-peptidic antagonists of the CGRP receptor, BIBN4096BS and MK-0974, interact with the calcitonin receptor-like receptor via methionine-42 and RAMP1 via tryptophan-74         |
| HEK-293  | 9.66  |      |      | Moore 2010 Mapping the CGRP receptor ligand binding domain: Tryptophan-84 of RAMP1 is critical for agonist and antagonist binding                                                            |
| Cos-7    | 10.35 |      | 7.23 | Qi 2010 Structure-Function Analysis of RAMP1-RAMP3 Chimeras                                                                                                                                  |
| Cos-7    | 10.1  |      | 7.36 | Qi 2008 Identification of N-terminal Receptor activity-modifying protein residues important for CGRP, AM and AMY receptor function                                                           |
| Cos-7    | 9.84  |      | 6.77 | Qi 2011 Structure function analysis of amino acid 74 of human RMAP1 and RAMP3 and its role in peptide interactions with adrenomedullin and CGRPr                                             |
| COS-7    | 9.6   |      |      | Simms J 2006 Characterization of the Structure of RAMP1 by Mutagenesis and Molecular Modeling                                                                                                |
| COS7     | 10.39 |      |      | Simms J 2009 Structure-Function Analysis of RAMP1 by Alanine Mutagenesis                                                                                                                     |
| COS-7    | 9.27  |      |      | Steiner 2002 The Transmembrane Domain of Receptor-Activity Modifying Protein one is essential for the functional expression of a calcitonin gene related peptide receptor                    |
| Cos-7    | 9.75  |      |      | Steiner 2003 The function of conserved cysteine residues in the extracellular domain of human receptor-activity-modifying protein 1                                                          |
| Cos-7    | 9.8   | 7.5  | 7.5  | Takei 2004 Novel fish-derived adrenomedullin in mammals: structure and possible function (Values from Hong 2012 The Pharmacology of Adrenomedullin2/Intermedin)                              |
| COS-7    | 9.6   | 6.97 | 6.93 | Udawela 2006a A critical role for the short intracellular C terminus in receptor activity-modifying protein function                                                                         |
| HEK293   | 8.49  | 6.8  | 7.32 | Udawela 2006a A critical role for the short intracellular C terminus in receptor activity-modifying protein function                                                                         |
| Cos-7    |       | 6.99 | 7.31 | Watkins 2014 Receptor activity-modifying protein-dependent effects of mutations in the calcitonin receptor-like receptor: implications of AM and CGRP pharmacology                           |
| HEK-293  | 9.66  | 9    | 7.75 | Weston 2016 Receptor Activity Modifying Protein-Directed G Protein Signaling Specificity for the Calcitonin Gene-related Peptide Family of Receptors                                         |
| HEK-293S | 9.88  | 8    | 8.42 | Weston 2016 Receptor Activity Modifying Protein-Directed G Protein Signaling Specificity for the Calcitonin Gene-related Peptide Family of Receptors                                         |
| HEK-293T | 9.3   |      |      | Weston 2015 Modulation of Glucagon Receptor Pharmacology by Receptor Activity-modifying Protein-2 (RAMP2)                                                                                    |
| Cos-7    | 9.82  |      |      | Woolley 2013 The role of ECL2 in CGRP receptor activation: a combined modelling and experimental approach                                                                                    |
| COS-7    | 10.34 |      |      | Woolley 2017 Understanding the molecular functions of the second extracellular loop (ECL2) of the calcitonin gene-related peptide (CGRP) receptor using a comprehensive mutagenesis approach |
| CHO-K1   | 9.5   | 6.87 |      | Wunder 2008 Pharmacological and Kinetic Characterization of AM1 and CGRP receptor reporter cell lines                                                                                        |

Data for AMY<sub>1</sub> Figure 5A

| Cell Type | pEC <sub>50</sub> |      |      |       | Reference                                                                                                                                                                                                                                                                                                                                               |
|-----------|-------------------|------|------|-------|---------------------------------------------------------------------------------------------------------------------------------------------------------------------------------------------------------------------------------------------------------------------------------------------------------------------------------------------------------|
|           | αCGRP             | rAmy | hAmy | βCGRP |                                                                                                                                                                                                                                                                                                                                                         |
| COS-7     | 9.38              |      |      |       | Gingell 2010 A key role for tryptophan 84 in receptor activity-modifying protein 1 in the amylin 1 receptor                                                                                                                                                                                                                                             |
| COS-7     | 9.72              |      |      |       | Gingell 2016 An allosteric role for receptor activity-modifying proteins in defining GPCR pharmacology                                                                                                                                                                                                                                                  |
| HEK293S   |                   | 8.98 | 9    |       | Gingell 2014 Activity of Pramlintide, Rat and Human Amylin but not Aβ1-42 at Human Amylin Receptors                                                                                                                                                                                                                                                     |
| COS-7     |                   | 9.9  | 9.71 |       | Gingell 2014 Activity of Pramlintide, Rat and Human Amylin but not Aβ1-42 at Human Amylin Receptors                                                                                                                                                                                                                                                     |
| COS-7     |                   |      | 9.76 |       | Harris 2013 A single pseudoproline and microwave solid phase peptide synthesis facilitates an efficient synthesis of human amylin 1-37                                                                                                                                                                                                                  |
| COS-7     | 8.7               | 9.12 |      | 9.16  | Hay 2005 Pharmacological Discrimination of Calcitonin Receptor: Receptor Activity-Modifying Protein Complexes                                                                                                                                                                                                                                           |
| COS-7     |                   |      |      | 9.17  | Hay 2006 Determinants of 1-Piperidinecarboxamide, N-[2-[[5-Amino-1-[[4-(4-pyridinyl)-1-piperazinyl]carbonyl]pentyl]amino]-1-[(3,5-dibromo-4-hydroxyphenyl)methyl]-2-oxoethyl]-4-(1,4-dihydro-2-oxo-3(2H)-quinazoliny)] (BIBN4096BS) Affinity for Calcitonin Gene-Related Peptide and Amylin Receptors—The Role of Receptor Activity Modifying Protein 1 |
| COS-7     | 9.55              |      |      |       | Hay 2014 Structure-activity relationships of the N-terminus of calcitonin gene-related peptide: key roles of alanine-5 and threonin-6 in receptor activation                                                                                                                                                                                            |
| COS-7     |                   | 9.41 |      |       | Lee 2016 Calcitonin and amylin receptor peptide interaction mechanisms: Insights into peptide-binding modes and allosteric modulation of the calcitonin receptor by receptor activity-modifying proteins                                                                                                                                                |
| COS-7     | 9.11              |      |      |       | Leuthauser 2000 Receptor-activity-modifying protein 1 forms heterodimers with two G-protein-coupled receptors to define ligand recognition                                                                                                                                                                                                              |
| HEK293    |                   | 9.69 |      |       | Morfis 2008 Receptor activity-modifying proteins differentially modulate the G protein-coupling efficiency of amylin receptors                                                                                                                                                                                                                          |
| COS-7     |                   | 9.23 |      |       | Morfis 2008 Receptor activity-modifying proteins differentially modulate the G protein-coupling efficiency of amylin receptors                                                                                                                                                                                                                          |
| RAEC      |                   | 9.66 | 8.73 |       | Muff 1999 An amylin receptor is revealed following co-transfection of a calcitonin receptor with receptor activity-modifying proteins-1 or -3                                                                                                                                                                                                           |
| COS-7     |                   |      |      | 10.73 | Qi 2008 Identification of N-terminal Receptor activity-modifying protein residues important for CGRP, AM and AMY receptor function                                                                                                                                                                                                                      |
| COS-7     |                   |      |      | 10.9  | Qi 2010 Structure-Function Analysis of RAMP1-RAMP3 Chimeras                                                                                                                                                                                                                                                                                             |
| HEK293S   | 9.16              | 10.1 |      |       | Qi 2013 Receptor activity-modifying protein-dependent impairment of calcitonin receptor splice variant Δ(1-47)hCT(a) function                                                                                                                                                                                                                           |
| COS-7     | 10.2              | 10.5 |      |       | Qi 2013 Receptor activity-modifying protein-dependent impairment of calcitonin receptor splice variant Δ(1-47)hCT(a) function                                                                                                                                                                                                                           |
| COS-7     | 8.08              | 8.61 |      |       | Udawela 2006a A Critical role for the short intracellular C terminus in receptor-activity modifying protein function                                                                                                                                                                                                                                    |
| COS-7     |                   | 8.47 |      |       | Udawela 2006b Distinct receptor activity-modifying protein domains differentially modulate interaction with calcitonin receptors                                                                                                                                                                                                                        |
| COS-7     | 9.63              |      |      |       | Walker 2015 A Second trigeminal CGRP receptor: function and expression of the AMY1 receptor                                                                                                                                                                                                                                                             |

αCGRP data for Figure 5B

| Cell Type | pEC <sub>50</sub> |                          |                          |                   |                     |                     |                     | Reference                                                                                                                                                                                                                                                                                                                                               |
|-----------|-------------------|--------------------------|--------------------------|-------------------|---------------------|---------------------|---------------------|---------------------------------------------------------------------------------------------------------------------------------------------------------------------------------------------------------------------------------------------------------------------------------------------------------------------------------------------------------|
|           | CGRP receptor     | AM <sub>1</sub> receptor | AM <sub>2</sub> receptor | CT <sub>(a)</sub> | AMY <sub>1(a)</sub> | AMY <sub>2(a)</sub> | AMY <sub>3(a)</sub> |                                                                                                                                                                                                                                                                                                                                                         |
| HEK293    | 9.01              | 6.83                     | 6.55                     |                   |                     |                     |                     | Aiyar 2001 Receptor activity modifying proteins interaction with human and porcine CRLR in HEK-293                                                                                                                                                                                                                                                      |
| COS-7     | 10.11             |                          |                          |                   |                     |                     |                     | Bailey 2006 Pharmacology of the human CGRP1 receptor in COS-7 cells                                                                                                                                                                                                                                                                                     |
| HEK293T   | 8.79              |                          |                          |                   |                     |                     |                     | Banerjee 2006 Identification of specific calcitonin-like receptor residues important for calcitonin gene-related peptide high affinity binding                                                                                                                                                                                                          |
| COS-7     | 9.81              |                          |                          |                   |                     |                     |                     | Barwell 2011 Extracellular loops 1 and 3 and their associated transmembrane regions of the calcitonin receptor-like receptor are needed for CGRP receptor function                                                                                                                                                                                      |
| COS-7     | 9.46              |                          |                          |                   |                     |                     |                     | Barwell 2010 Mapping interaction sites within the N-terminus of the calcitonin gene-related peptide receptor; the role of residues 23–60 of the calcitonin receptor-like receptor                                                                                                                                                                       |
| COS-7     | 9.65              |                          |                          |                   |                     |                     |                     | Booe 2015 Structural Basis for RAMP dependent selective peptide recognition by a GPCR                                                                                                                                                                                                                                                                   |
| COS-7     | 9.35              |                          |                          |                   |                     |                     |                     | Conner 2005 A Key Role for Transmembrane Prolines in Calcitonin Receptor-Like Receptor Agonist Binding and Signalling: Implications for Family B G-Protein-Coupled Receptors                                                                                                                                                                            |
| COS-7     | 9.4               |                          |                          |                   |                     |                     |                     | Conner 2006 Diverse functional motifs within the three intracellular loops of the CGRP1 receptor                                                                                                                                                                                                                                                        |
| COS-7     | 9.53              |                          |                          |                   |                     |                     |                     | Conner 2006 The Second Intracellular Loop of the Calcitonin Gene-related Peptide Receptor Provides Molecular Determinants for Signal Transduction and Cell Surface Expression                                                                                                                                                                           |
| COS-7     | 9.85              |                          |                          |                   |                     |                     |                     | Conner 2008 Functional and Biophysical analysis of the C-terminus of the CGRP-receptor; a Family B GPCR                                                                                                                                                                                                                                                 |
| HEK293    | 10.44             |                          |                          |                   |                     |                     |                     | Fitzsimmons 2003 The Extracellular domain of Receptor Activity-modifying Protein 1 is sufficient for Calcitonin Receptor-like Receptor Function                                                                                                                                                                                                         |
| HEK293T   | 8.18              | 6.72                     | 6.64                     |                   |                     |                     |                     | Fraser 1999 The Amino Terminus of Receptor Activity Modifying Proteins is a Critical Determinant of Glycosylation State and Ligand Binding of CRLR                                                                                                                                                                                                      |
| COS-7     |                   |                          |                          | 6.8               | 9.38                |                     |                     | Gingell 2010 A key role for tryptophan 84 in receptor activity-modifying protein 1 in the amylin 1 receptor                                                                                                                                                                                                                                             |
| COS-7     |                   |                          |                          | 7.2               | 9.72                | 8.17                | 8.21                | Gingell 2016 An allosteric role for receptor activity-modifying proteins in defining GPCR pharmacology                                                                                                                                                                                                                                                  |
| COS-7     | 9.47              | 6.39                     | 6.87                     | 6.8               | 8.7                 |                     | 7.6                 | Hay 2005 Pharmacological Discrimination of Calcitonin Receptor: Receptor Activity-Modifying Protein Complexes                                                                                                                                                                                                                                           |
| COS-7     | 9.52              |                          | 6.67                     |                   |                     |                     |                     | Hay 2006 Determinants of 1-Piperidinecarboxamide, N-[2-[[5-Amino-1-[[4-(4-pyridinyl)-1-piperazinyl]carbonyl]pentyl]amino]-1-[(3,5-dibromo-4-hydroxyphenyl)methyl]-2-oxoethyl]-4-(1,4-dihydro-2-oxo-3(2H)-quinazoliny)] (BIBN4096BS) Affinity for Calcitonin Gene-Related Peptide and Amylin Receptors—The Role of Receptor Activity Modifying Protein 1 |
| COS-7     |                   |                          |                          |                   | 9.55                |                     |                     | Hay 2014 Structure-activity relationships of the N-terminus of calcitonin gene-related peptide: key roles of alanine-5 and threonine-6 in receptor activation                                                                                                                                                                                           |
| HEK293    | 9.47              |                          |                          |                   |                     |                     |                     | Kuwasako 2000 Visualization of the Calcitonin Receptor-like Receptor and Its Receptor Activity-modifying Proteins during Internalization and Recycling                                                                                                                                                                                                  |
| HEK293    | 9.47              |                          |                          |                   |                     |                     |                     | Kuwasako 2001 The seven amino acids of human RAMP2 (86-92) and RAMP3 (59-65) are critical for agonist binding to human adrenomedullin receptors                                                                                                                                                                                                         |
| HEK293    | 9.16              |                          |                          |                   |                     |                     |                     | Kuwasako 2003 Identification of the Human Receptor Activity-modifying Protein 1 Domains Responsible for Agonist Binding Specificity                                                                                                                                                                                                                     |

|         |       |      |      |      |      |      |      |                                                                                                                                                                                      |
|---------|-------|------|------|------|------|------|------|--------------------------------------------------------------------------------------------------------------------------------------------------------------------------------------|
| HEK293  | 9.77  |      |      |      |      |      |      | Kuwasako 2006 Functions of the Cytoplasmic Tails of the Human Receptor Activity-modifying Protein Components of Calcitonin Gene-related Peptide and Adrenomedullin Receptors         |
| HEK293  | 9.7   | 6.63 | 7.13 |      |      |      |      | Kuwasako 2012 The third extracellular loop of the human calcitonin receptor-like receptor is crucial for the activation of adrenomedullin signalling                                 |
| COS-7   |       |      |      |      | 9.11 |      |      | Leuthauser 2000 Receptor-activity-modifying protein 1 forms heterodimers with two G-protein-coupled receptors to define ligand recognition                                           |
| COS-7   | 9.64  |      |      |      |      |      |      | Miller 2010 Non-peptidic antagonists of the CGRP receptor, BIBN4096BS and MK-0974, interact with the calcitonin receptor-like receptor via methionine-42 and RAMP1 via tryptophan-74 |
| HEK293  | 9.66  |      |      |      |      |      |      | Moore 2010 Mapping the CGRP receptor ligand binding domain: Tryptophan-84 of RAMP1 is critical for agonist and antagonist binding                                                    |
| COS-7   | 10.1  |      | 7.36 |      |      |      |      | Qi 2008 Identification of N-terminal Receptor activity-modifying protein residues important for CGRP, AM and AMY receptor function                                                   |
| COS-7   | 10.35 |      | 7.23 |      |      |      |      | Qi 2010 Structure-Function Analysis of RAMP1-RAMP3 Chimeras                                                                                                                          |
| COS-7   | 9.84  |      | 6.77 |      |      |      |      | Qi 2011 Structure function analysis of amino acid 74 of human RMAP1 and RAMP3 and its role in peptide interactions with adrenomedullin and CGRP                                      |
| HEK293S |       |      |      | 8.11 | 9.16 |      | 9.17 | Qi 2013 Receptor activity-modifying protein-dependent impairment of calcitonin receptor splice variant $\Delta(1-47)$ hCT(a) function                                                |
| COS-7   |       |      |      | 8.34 | 10.2 |      | 7.91 | Qi 2013 Receptor activity-modifying protein-dependent impairment of calcitonin receptor splice variant $\Delta(1-47)$ hCT(a) function                                                |
| COS-7   | 9.6   |      |      |      |      |      |      | Simms 2006 Characterization of the Structure of RAMP1 by Mutagenesis and Molecular Modeling                                                                                          |
| COS-7   | 10.39 |      |      |      |      |      |      | Simms 2009 Structure-Function Analysis of RAMP1 by Alanine Mutagenesis                                                                                                               |
| COS-7   | 9.27  |      |      |      |      |      |      | Steiner 2002 The Transmembrane Domain of Receptor-Activity Modifying Protein one is essential for the functional expression of a calcitonin gene related peptide receptor            |
| COS-7   | 9.75  |      |      |      |      |      |      | Steiner 2003 The function of conserved cysteine residues in the extracellular domain of human receptor-activity-modifying protein 1                                                  |
| COS-7   | 9.8   | 7.5  | 7.5  |      |      |      |      | Takei 2004 Novel fish-derived adrenomedullin in mammals: structure and possible function, values from Hong 2012 Pharmacology of AM2                                                  |
| COS-7   | 9.6   | 6.97 | 6.93 | 7.2  | 8.08 | 7.29 |      | Udawela 2006a A critical role for the short intracellular C terminus in receptor activity-modifying protein function                                                                 |
| HEK293  | 8.49  | 6.8  | 7.32 |      |      |      |      | Udawela 2006a A critical role for the short intracellular C terminus in receptor activity-modifying protein function                                                                 |
| COS-7   |       |      |      | 6.88 |      | 7.11 | 7.62 | Udawela 2006b Distinct receptor activity-modifying protein domains differentially modulate interaction with calcitonin receptors                                                     |
| COS-7   | 9.92  |      |      |      | 9.63 |      |      | Walker 2015 A Second trigeminal CGRP receptor: function and expression of the AMY1 receptor                                                                                          |
| COS-7   |       | 6.99 | 7.31 |      |      |      |      | Watkins 2014 Receptor activity-modifying protein-dependent effects of mutations in the calcitonin receptor-like receptor: implications of AM and CGRP pharmacology                   |
| HEK293T | 9.3   |      |      |      |      |      |      | Weston 2015 Modulation of Glucagon Receptor Pharmacology by Receptor Activity-modifying Protein-2 (RAMP2)                                                                            |
| HEK293S | 9.88  | 8    | 8.42 |      |      |      |      | Weston 2016 Receptor Activity Modifying Protein-Directed G Protein Signaling Specificity for the Calcitonin Gene-related Peptide Family of Receptors                                 |
| HEK293  | 9.66  | 9    | 7.75 |      |      |      |      | Weston 2016 Receptor Activity Modifying Protein-Directed G Protein Signaling Specificity for the Calcitonin Gene-related Peptide Family of Receptors                                 |
| COS-7   | 9.82  |      |      |      |      |      |      | Woolley 2013 The role of ECL2 in CGRP receptor activation: a combined modelling and experimental approach                                                                            |



|        |       |      |  |  |  |  |  |                                                                                                                                                                                              |
|--------|-------|------|--|--|--|--|--|----------------------------------------------------------------------------------------------------------------------------------------------------------------------------------------------|
| COS-7  | 10.34 |      |  |  |  |  |  | Woolley 2017 Understanding the molecular functions of the second extracellular loop (ECL2) of the calcitonin gene-related peptide (CGRP) receptor using a comprehensive mutagenesis approach |
| CHO-K1 | 9.5   | 6.87 |  |  |  |  |  | Wunder 2008 Pharmacological and Kinetic Characterization of AM1 and CGRP receptor reporter cell lines                                                                                        |

$\beta$ CGRP data for Figures 3 and 5

| Cell Type | pEC <sub>50</sub> |                          |                          |                           | Reference                                                                                                                                                                                                                                                                                                                                               |
|-----------|-------------------|--------------------------|--------------------------|---------------------------|---------------------------------------------------------------------------------------------------------------------------------------------------------------------------------------------------------------------------------------------------------------------------------------------------------------------------------------------------------|
|           | CGRP receptor     | AM <sub>1</sub> receptor | AM <sub>2</sub> Receptor | AMY <sub>1</sub> receptor |                                                                                                                                                                                                                                                                                                                                                         |
| HEK-293   | 9.09              | 7.43                     | 6.17                     |                           | Aiyar 2001 Receptor activity modifying proteins interaction with human and porcine CRLR in HEK-293                                                                                                                                                                                                                                                      |
| Cos-7     | 10.5              |                          |                          |                           | Bailey 2006 Pharmacology of the human CGRP1 receptor in COS-7 cells                                                                                                                                                                                                                                                                                     |
| HEK-293T  | 8.11              | 7.67                     | 7.45                     | 9.17                      | Fraser 1999 The Amino Terminus of Receptor Activity Modifying Proteins is a Critical Determinant of Glycosylation State and Ligand Binding of CRLR                                                                                                                                                                                                      |
| COS-7     |                   |                          |                          | 9.16                      | Hay 2005 Pharmacological Discrimination of Calcitonin Receptor: Receptor Activity-Modifying Protein Complexes                                                                                                                                                                                                                                           |
| COS-7     | 9.76              |                          | 7.36                     |                           | Hay 2006 Determinants of 1-Piperidinecarboxamide, N-[2-[[5-Amino-1-[[4-(4-pyridinyl)-1-piperazinyl]carbonyl]pentyl]amino]-1-[(3,5-dibromo-4-hydroxyphenyl)methyl]-2-oxoethyl]-4-(1,4-dihydro-2-oxo-3(2H)-quinazoliny)] (BIBN4096BS) Affinity for Calcitonin Gene-Related Peptide and Amylin Receptors—The Role of Receptor Activity Modifying Protein 1 |
| Cos-7     | 10.77             |                          | 7.61                     | 10.9                      | Qi 2010 Structure-Function Analysis of RAMP1-RAMP3 Chimeras                                                                                                                                                                                                                                                                                             |
| Cos-7     |                   |                          |                          | 10.73                     | Qi 2008 Identification of N-terminal Receptor activity-modifying protein residues important for CGRP, AM and AMY receptor function                                                                                                                                                                                                                      |
| CHO-K1    | 9.53              | 7.95                     |                          |                           | Wunder 2008 Pharmacological and Kinetic Characterization of AM1 and CGRP receptor reporter cell lines                                                                                                                                                                                                                                                   |
